# Supplementary material
Source: PubMed Central journal article supplement (PMC4793571)
Supplement: soop015545.wt1_default.pdf [file soop015545.wt1_default.pdf]

Appendix 1. Mortality figures and crude, propensity score adjusted, and traditionally adjusted subdistribution hazard ratios for radiotherapy versus radical prostatectomy for prostate cancer- and other cause- mortality, stratified by year of diagnosis and risk group

|                                                | No. of events/Total no. (%) |                  | Crude                    | p-value | Propensity-score                     | p-value | Traditional covariate                | p-value |
|------------------------------------------------|-----------------------------|------------------|--------------------------|---------|--------------------------------------|---------|--------------------------------------|---------|
|                                                | RT                          | RP               | sHR (95% CI)<br>RT vs RP |         | adjusted<br>sHR (95% CI)<br>RT vs RP |         | adjusted<br>sHR (95% CI)<br>RT vs RP |         |
| <b>1996-1999</b>                               |                             |                  |                          |         |                                      |         |                                      |         |
| <b>Risk group 1</b>                            |                             |                  |                          |         |                                      |         |                                      |         |
| Prostate cancer mortality                      | 18/259 (6.9%)               | 19/716 (2.7%)    | 2.81 (1.47 to 5.39)      | 0.002   | 3.44 (1.72 to 6.87)                  | <0.001  | NA                                   |         |
| Other cause mortality                          | 39/259 (15.1%)              | 101/716 (14.1%)  | 1.11 (0.77 to 1.61)      | 0.566   | 0.81 (0.54 to 1.23)                  | 0.332   | 0.80 (0.53 to 1.21)                  | 0.294   |
| <b>Risk group 2</b>                            |                             |                  |                          |         |                                      |         |                                      |         |
| Prostate cancer mortality                      | 53/426 (12.4%)              | 52/711 (7.3%)    | 1.78 (1.22 to 2.62)      | 0.003   | 1.80 (1.22 to 2.65)                  | 0.003   | 1.74 (1.15 to 2.64)                  | 0.009   |
| Other cause mortality                          | 108/426 (25.4%)             | 100/711 (14.1%)  | 1.99 (1.52 to 2.62)      | <0.001  | 1.75 (1.30 to 2.35)                  | <0.001  | 1.54 (1.10 to 2.15)                  | 0.012   |
| <b>Risk group 3</b>                            |                             |                  |                          |         |                                      |         |                                      |         |
| Prostate cancer mortality                      | 181/792 (22.9%)             | 43/347 (12.4%)   | 1.98 (1.42 to 2.75)      | <0.001  | 2.09 (1.46 to 3.00)                  | <0.001  | 2.10 (1.40 to 3.14)                  | <0.001  |
| Other cause mortality                          | 176/792 (22.2%)             | 59/347 (17.0%)   | 1.36 (1.01 to 1.82)      | 0.042   | 1.23 (0.89 to 1.70)                  | 0.209   | NA                                   |         |
| <b>Non-metastatic<br/>(risk groups 1 to 3)</b> |                             |                  |                          |         |                                      |         |                                      |         |
| Prostate cancer mortality                      | 252/1477 (17.1%)            | 114/1774 (6.4%)  | 2.87 (2.30 to 3.57)      | <0.001  | 2.08 (1.60 to 2.70)                  | <0.001  | 2.05 (1.57 to 2.67)                  | <0.001  |
| Other cause mortality                          | 323/1477 (21.9%)            | 260/1774 (14.7%) | 1.58 (1.34 to 1.86)      | <0.001  | 1.17 (0.96 to 1.44)                  | 0.116   | 1.16 (0.95 to 1.41)                  | 0.144   |
| <b>Risk group 4</b>                            |                             |                  |                          |         |                                      |         |                                      |         |

|                                            |                  |                 |                     |        |                      |        |                     |        |
|--------------------------------------------|------------------|-----------------|---------------------|--------|----------------------|--------|---------------------|--------|
| Prostate cancer mortality                  | 52/178 (29.2%)   | 10/34 (29.4%)   | 0.98 (0.50 to 1.93) | 0.950  | 0.70 (0.33 to 1.53)  | 0.373  | NA                  |        |
| Other cause mortality                      | 38/178 (21.3%)   | 7/34 (20.6%)    | 1.05 (0.48 to 2.31) | 0.903  | 0.91 (0.40 to 2.08)  | 0.822  | NA                  |        |
| <b>2000-2004</b>                           |                  |                 |                     |        |                      |        |                     |        |
| <b>Risk group 1</b>                        |                  |                 |                     |        |                      |        |                     |        |
| Prostate cancer mortality                  | 11/1336 (0.8%)   | 19/3963 (0.5%)  | 1.58 (0.75 to 3.34) | 0.228  | 1.41 (0.66 to 3.02)  | 0.375  | 1.46 (0.68 to 3.14) | 0.334  |
| Other cause mortality                      | 141/1336 (10.6%) | 226/3963 (5.7%) | 1.81 (1.47 to 2.23) | <0.001 | 1.42 (1.12 to 1.79)  | 0.003  | 1.42 (1.12 to 1.80) | 0.003  |
| <b>Risk group 2</b>                        |                  |                 |                     |        |                      |        |                     |        |
| Prostate cancer mortality                  | 77/1506 (5.1%)   | 63/2658 (2.4%)  | 2.05 (1.47 to 2.86) | <0.001 | 1.92 (1.31 to 2.82)  | <0.001 | 1.96 (1.34 to 2.87) | <0.001 |
| Other cause mortality                      | 205/1506 (13.6%) | 182/2658 (6.8%) | 1.93 (1.58 to 2.36) | <0.001 | 1.43 (1.15 to 1.78)  | 0.001  | 1.42 (1.13 to 1.77) | 0.002  |
| <b>Risk group 3</b>                        |                  |                 |                     |        |                      |        |                     |        |
| Prostate cancer mortality                  | 181/1999 (9.1%)  | 58/850 (6.8%)   | 1.32 (0.98 to 1.77) | 0.062  | 1.12 (0.80 to 1.55)  | 0.513  | 1.18 (0.84 to 1.66) | 0.343  |
| Other cause mortality                      | 233/1999 (11.7%) | 62/850 (7.3%)   | 1.60 (1.21 to 2.12) | <0.001 | 1.39 (1.00 to 1.92)  | 0.049  | 1.38 (0.99 to 1.91) | 0.059  |
| <b>Non-metastatic (risk groups 1 to 3)</b> |                  |                 |                     |        |                      |        |                     |        |
| Prostate cancer mortality                  | 269/4841 (5.6%)  | 140/7471 (1.9%) | 2.88 (2.35 to 3.53) | <0.001 | 1.50 (1.17 to 1.93)  | 0.001  | 1.50 (1.17 to 1.92) | 0.001  |
| Other cause mortality                      | 579/4841 (12.0%) | 470/7471 (6.3%) | 1.86 (1.65 to 2.10) | <0.001 | 1.46 (1.26 to 1.69)  | <0.001 | 1.40 (1.22 to 1.62) | <0.001 |
| <b>Risk group 4</b>                        |                  |                 |                     |        |                      |        |                     |        |
| Prostate cancer mortality                  | 37/235 (15.7%)   | 19/143 (13.3%)  | 1.21 (0.70 to 2.09) | 0.502  | 1.30 (0.69 to 2.47)  | 0.414  | 1.07 (0.53 to 2.18) | 0.844  |
| Other cause mortality                      | 20/235 (8.5%)    | 23/143 (16.1%)  | 0.49 (0.27 to 0.88) | 0.017  | 0.69 (0.34 to 1.43)  | 0.319  | 0.36 (0.12 to 1.11) | 0.075  |
| <b>2005-2009</b>                           |                  |                 |                     |        |                      |        |                     |        |
| <b>Risk group 1</b>                        |                  |                 |                     |        |                      |        |                     |        |
| Prostate cancer mortality                  | 3/1444 (0.2%)    | 6/5324 (0.1%)   | 1.89 (0.47 to 7.57) | 0.367  | 2.33 (0.42 to 12.83) | 0.332  | NA                  |        |
| Other cause mortality                      | 43/1444 (3.0%)   | 85/5324 (1.6%)  | 1.92 (1.33 to 2.78) | <0.001 | 1.15 (0.75 to 1.76)  | 0.526  | 1.08 (0.69 to 1.68) | 0.734  |
| <b>Risk group 2</b>                        |                  |                 |                     |        |                      |        |                     |        |
| Prostate cancer mortality                  | 12/2098 (0.6%)   | 16/4756 (0.3%)  | 1.77 (0.84 to 3.74) | 0.132  | 1.61 (0.70 to 3.70)  | 0.265  | 1.66 (0.71 to 3.87) | 0.239  |
| Other cause mortality                      | 63/2098 (3.0%)   | 83/4756 (1.7%)  | 1.80 (1.29 to 2.49) | <0.001 | 1.15 (0.81 to 1.64)  | 0.423  | 1.19 (0.83 to 1.70) | 0.350  |
| <b>Risk group 3</b>                        |                  |                 |                     |        |                      |        |                     |        |
| Prostate cancer mortality                  | 56/2249 (2.5%)   | 17/1412 (1.2%)  | 2.18 (1.27 to 3.76) | 0.005  | 1.95 (1.05 to 3.62)  | 0.034  | 2.16 (1.14 to 4.08) | 0.018  |
| Other cause mortality                      | 49/2249 (2.2%)   | 33/1412 (2.3%)  | 0.97 (0.62 to 1.50) | 0.877  | 0.82 (0.46 to 1.46)  | 0.500  | 0.83 (0.46 to 1.49) | 0.534  |

|                                                |                 |                  |                     |        |                     |       |                     |       |
|------------------------------------------------|-----------------|------------------|---------------------|--------|---------------------|-------|---------------------|-------|
| <b>Non-metastatic<br/>(risk groups 1 to 3)</b> |                 |                  |                     |        |                     |       |                     |       |
| Prostate cancer mortality                      | 71/5791 (1.2%)  | 39/11492 (0.3%)  | 3.85 (2.60 to 5.70) | <0.001 | 1.93 (1.21 to 3.10) | 0.006 | 1.90 (1.17 to 3.09) | 0.009 |
| Other cause mortality                          | 155/5791 (2.7%) | 201/11492 (1.7%) | 1.62 (1.31 to 1.99) | <0.001 | 1.08 (0.83 to 1.41) | 0.573 | 1.06 (0.82 to 1.36) | 0.675 |
| <b>Risk group 4</b>                            |                 |                  |                     |        |                     |       |                     |       |
| Prostate cancer mortality                      | 13/404 (3.2%)   | 14/212 (6.6%)    | 0.67 (0.31 to 1.44) | 0.305  | 0.57 (0.25 to 1.32) | 0.189 | NA                  |       |
| Other cause mortality                          | 7/404 (1.7%)    | 10/212 (4.7%)    | 0.43 (0.15 to 1.18) | 0.100  | 1.01 (0.31 to 3.24) | 0.990 | NA                  |       |

List of abbreviations: RP–Radical prostatectomy, RT–Radiotherapy, sHR–Subdistribution hazard ratio, CI–Confidence interval.
