# Supplementary material
Source: PubMed Central journal article supplement (PMC4793571)
Supplement: soop015545.wt2_default.pdf [file soop015545.wt2_default.pdf]

Appendix 2. Mortality figures and crude, propensity score adjusted, traditionally adjusted, and inverse probability of treatment weight (IPTW) adjusted hazard ratios for radiotherapy versus radical prostatectomy for prostate cancer- and other cause-specific mortality, stratified by risk group

|                                                | No. of events/Total no. (%) |                  | Crude<br>HR (95% CI) | p-value | Propensity-score<br>adjusted<br>HR (95% CI) | p-value | Traditional covariate<br>adjusted<br>HR (95% CI) | p-value | Inverse Probability of<br>Treatment Weighted<br>HR (95% CI) | p-value |
|------------------------------------------------|-----------------------------|------------------|----------------------|---------|---------------------------------------------|---------|--------------------------------------------------|---------|-------------------------------------------------------------|---------|
|                                                | RT                          | RP               | RT vs RP             |         | RT vs RP                                    |         | RT vs RP                                         |         | RT vs RP                                                    |         |
| <b>Risk group 1</b>                            |                             |                  |                      |         |                                             |         |                                                  |         |                                                             |         |
| Prostate cancer-specific mortality             | 32/3039 (1.1%)              | 44/10003 (0.4%)  | 2.23 (1.41-3.52)     | <0.001  | 1.95 (1.19-3.19)                            | 0.008   | 2.06 (1.25-3.38)                                 | 0.004   | 1.81 (1.13-2.90)                                            | 0.014   |
| Other cause-specific mortality                 | 223/3039 (7.3%)             | 412/10003 (4.1%) | 1.68 (1.43-1.98)     | <0.001  | 1.26 (1.06-1.51)                            | 0.011   | 1.25 (1.05-1.50)                                 | 0.014   | 1.14 (0.95-1.37)                                            | 0.149   |
| <b>Risk group 2</b>                            |                             |                  |                      |         |                                             |         |                                                  |         |                                                             |         |
| Prostate cancer-specific mortality             | 142/4030 (3.5%)             | 131/8125 (1.6%)  | 2.05 (1.62-2.60)     | <0.001  | 1.84 (1.42-2.39)                            | <0.001  | 1.82 (1.40-2.37)                                 | <0.001  | 1.87 (1.47-2.39)                                            | <0.001  |
| Other cause-specific mortality                 | 376/4030 (9.3%)             | 365/8125 (4.5%)  | 1.98 (1.71-2.28)     | <0.001  | 1.46 (1.25-1.71)                            | <0.001  | 1.42 (1.21-1.67)                                 | <0.001  | 1.38 (1.18-1.60)                                            | <0.001  |
| <b>Risk group 3</b>                            |                             |                  |                      |         |                                             |         |                                                  |         |                                                             |         |
| Prostate cancer-specific mortality             | 418/5040 (8.3%)             | 118/2609 (4.5%)  | 1.73 (1.41-2.12)     | <0.001  | 1.52 (1.21-1.91)                            | <0.001  | 1.65 (1.31-2.08)                                 | <0.001  | 1.64 (1.35-2.00)                                            | <0.001  |
| Other cause-specific mortality                 | 458/5040 (9.1%)             | 154/2609 (5.9%)  | 1.47 (1.22-1.76)     | <0.001  | 1.24 (1.00-1.54)                            | 0.045   | 1.23 (1.00-1.52)                                 | 0.055   | 1.26 (1.06-1.51)                                            | 0.011   |
| <b>Non-metastatic<br/>(risk groups 1 to 3)</b> |                             |                  |                      |         |                                             |         |                                                  |         |                                                             |         |
| Prostate cancer-specific mortality             | 592/12109 (4.9%)            | 293/20737 (1.4%) | 3.20 (2.78-3.68)     | <0.001  | 1.80 (1.53-2.12)                            | <0.001  | 1.80 (1.53-2.12)                                 | <0.001  | 1.69 (1.47-1.95)                                            | <0.001  |
| Other cause-specific mortality                 | 1057/12109 (8.7%)           | 931/20737 (4.5%) | 1.82 (1.66-1.99)     | <0.001  | 1.34 (1.21-1.49)                            | <0.001  | 1.30 (1.17-1.44)                                 | <0.001  | 1.22 (1.12-1.34)                                            | <0.001  |
| <b>Risk group 4</b>                            |                             |                  |                      |         |                                             |         |                                                  |         |                                                             |         |
| Prostate cancer-specific mortality             | 102/817 (12.5%)             | 43/389 (11.1%)   | 0.98 (0.69-1.40)     | 0.913   | 0.73 (0.47-1.15)                            | 0.172   | 0.65 (0.40-1.04)                                 | 0.071   | 0.54 (0.39-0.74)                                            | <0.001  |
| Other cause-specific mortality                 | 65/817 (8.0%)               | 40/389 (10.3%)   | 0.70 (0.47-1.04)     | 0.074   | 0.74 (0.43-1.29)                            | 0.288   | 0.57 (0.32-1.03)                                 | 0.064   | 0.59 (0.40-0.89)                                            | 0.011   |

List of abbreviations: RP–Radical prostatectomy, RT–Radiotherapy, HR–Hazard ratio, CI–Confidence interval.
